# Supplementary material
Source: PubMed Central journal article supplement (PMC8405866)
Supplement: NIHMS1733058-supplement-supplementary_tables.pdf [file NIHMS1733058-supplement-supplementary_tables.pdf]

## Supplemental Information

**SUPPLEMENTAL TABLE 3** Demographic and Clinical Characteristics of Children and Adolescents Treated for Drug-Susceptible TB in the South African Reporting Cohort, Comparing Those With Known and Unknown Treatment Outcomes, 2004–2016

| Variable                          | Unknown Outcomes ( <i>n</i> = 116 808), <i>n</i> | Unknown Outcomes, % | Known Outcomes ( <i>n</i> = 612 655), <i>n</i> | Known Outcomes, % |
|-----------------------------------|--------------------------------------------------|---------------------|------------------------------------------------|-------------------|
| Age, y                            |                                                  |                     |                                                |                   |
| 0–4                               | 52 634                                           | 45                  | 287 085                                        | 47                |
| 5–9                               | 19 460                                           | 17                  | 115 156                                        | 19                |
| 10–14                             | 11 059                                           | 9                   | 63 615                                         | 10                |
| 15–19                             | 33 655                                           | 29                  | 146 799                                        | 24                |
| Sex                               |                                                  |                     |                                                |                   |
| Male                              | 57 540                                           | 49                  | 298 020                                        | 49                |
| Female                            | 59 263                                           | 51                  | 314 634                                        | 51                |
| HIV status                        |                                                  |                     |                                                |                   |
| HIV-negative                      | 29 034                                           | 25                  | 216 753                                        | 35                |
| HIV-positive, on ART              | 7575                                             | 6                   | 48 493                                         | 8                 |
| HIV-positive, no ART              | 9157                                             | 8                   | 37 418                                         | 6                 |
| HIV status unknown                | 71 042                                           | 61                  | 309 991                                        | 51                |
| Previous TB history               |                                                  |                     |                                                |                   |
| New                               | 107 484                                          | 92                  | 584 350                                        | 95                |
| Retreatment                       | 9323                                             | 8                   | 28 305                                         | 5                 |
| Site of TB disease <sup>a</sup>   |                                                  |                     |                                                |                   |
| Pulmonary TB                      | 102 786                                          | 88                  | 561 255                                        | 92                |
| Extra pulmonary TB                | 14 018                                           | 12                  | 51 400                                         | 8                 |
| Disseminated disease <sup>b</sup> |                                                  |                     |                                                |                   |
| Not disseminated                  | 99 130                                           | 85                  | 541 006                                        | 88                |
| Disseminated                      | 2856                                             | 2                   | 9389                                           | 2                 |
| Year                              |                                                  |                     |                                                |                   |
| 2004                              | 12 692                                           | 11                  | 40 389                                         | 7                 |
| 2005                              | 11 330                                           | 10                  | 44 096                                         | 7                 |
| 2006                              | 10 844                                           | 9                   | 49 638                                         | 8                 |
| 2007                              | 10 912                                           | 9                   | 52 069                                         | 8                 |
| 2008                              | 11 900                                           | 10                  | 56 206                                         | 9                 |
| 2009                              | 10 759                                           | 9                   | 58 800                                         | 10                |
| 2010                              | 10 661                                           | 9                   | 53 342                                         | 9                 |
| 2011                              | 8619                                             | 7                   | 55 268                                         | 9                 |
| 2012                              | 6965                                             | 6                   | 48 037                                         | 8                 |
| 2013                              | 6118                                             | 5                   | 45 454                                         | 7                 |
| 2014                              | 8120                                             | 7                   | 39 784                                         | 6                 |
| 2015                              | 4351                                             | 4                   | 38 635                                         | 6                 |
| 2016                              | 3537                                             | 3                   | 30 937                                         | 5                 |

Tests of significance are not displayed because of the sample sizes of all categories were significantly different.

<sup>a</sup> The binary classification of site of disease included pulmonary TB, which was based on the presence of any pulmonary TB, and EPTB, which was restricted to exclusive EPTB.

<sup>b</sup> Disseminated disease was based on ICD-10 coding, with neurologic TB and miliary TB recorded as disseminated disease and all other ICD-10 codes recorded as not disseminated.



**SUPPLEMENTAL TABLE 5** SMRs of Children and Adolescents Treated for Drug-Susceptible TB in the South African Reporting Cohort by Using Observed Deaths and Expected Deaths, by HIV Status, 2004–2016

| Year | HIV Status   | Patients With TB |        | Observed TB Deaths |        | Expected Deaths |        | TB Mortality Rate <sup>a</sup> |        | Population Mortality Rate <sup>a</sup> |        | SMR <sup>b</sup> |        |
|------|--------------|------------------|--------|--------------------|--------|-----------------|--------|--------------------------------|--------|----------------------------------------|--------|------------------|--------|
|      |              | Male             | Female | Male               | Female | Male            | Female | Male                           | Female | Male                                   | Female | Male             | Female |
| 2013 | HIV-negative | 16 614           | 16 656 | 142                | 144    | 95.38           | 83.81  | 1.80                           | 1.81   | 1.21                                   | 1.05   | 1.49             | 1.72   |
| 2014 | HIV-negative | 16 450           | 16 072 | 148                | 122    | 87.06           | 74.62  | 2.06                           | 1.74   | 1.21                                   | 1.06   | 1.70             | 1.64   |
| 2015 | HIV-negative | 15 210           | 14 944 | 121                | 121    | 88.21           | 76.69  | 1.67                           | 1.69   | 1.22                                   | 1.07   | 1.37             | 1.58   |
| 2016 | HIV-negative | 12 314           | 11 836 | 97                 | 110    | 72.07           | 61.03  | 1.65                           | 1.95   | 1.23                                   | 1.08   | 1.35             | 1.80   |
| 2013 | HIV-positive | 4927             | 6182   | 217                | 324    | 49.76           | 35.25  | 9.27                           | 11.20  | 2.13                                   | 1.22   | 4.36             | 9.19   |
| 2014 | HIV-positive | 5078             | 6087   | 265                | 261    | 41.23           | 25.84  | 12.27                          | 10.09  | 1.91                                   | 1.00   | 6.43             | 10.10  |
| 2015 | HIV-positive | 4664             | 5536   | 222                | 273    | 40.14           | 24.16  | 9.84                           | 10.42  | 1.78                                   | 0.92   | 5.53             | 11.30  |
| 2016 | HIV-positive | 3863             | 4509   | 200                | 231    | 30.82           | 18.65  | 10.74                          | 10.81  | 1.66                                   | 0.87   | 6.49             | 12.39  |

<sup>a</sup> Mortality rates are expressed per 100 person-years.

<sup>b</sup> SMR is the ratio of observed TB deaths to the expected deaths and is based on the Thembisa estimates of mortality rates for the general population. Expected mortality is based on the HIV-positive and HIV-negative population estimates of mortality rates, regardless of age.
